# Supplementary material
Source: publisher figshare collection journal article supplement (https://acs.figshare.com/ndownloader/files/7725325)
Supplement: Supplementary file 1 [file 7725325]

Compound_ID	SMILES
Gemcitabine	NC(C=CN1[C@@]2([H])[C@@](F)(F)[C@@](O)([H])[C@](CO)([H])O2)=NC1=O
gemcitabine-N4-propylpentanamide	O=C1N=C(NC(C(CCC)CCC)=O)C=CN1[C@@]2([H])[C@@](F)(F)[C@@](O)([H])[C@](CO)([H])O2
5'-L-Val ester of gemcitabine	NC(C=CN1[C@@]2([H])[C@@](F)(F)[C@@](O)([H])[C@](COC([C@H](N)C(C)C)=O)([H])O2)=NC1=O
5'-D-phenylalanyl ester of gemcitabine	NC(C=CN1[C@@]2([H])[C@@](F)(F)[C@@](O)([H])[C@](COC([C@@H](N)CC3=CC=CC=C3)=O)([H])O2)=NC1=O
GSC	O=C1C=C(NC(CCC(OC(CC([O])=O)C[N+](C)(C)C)=O)=O)C=CN1[C@@]2([H])[C@@](F)(F)[C@@](O)([H])[C@](CO)([H])O2
GHC	O=C1N=C(NC(CCCCC(OC(CC([O-])=O)C[N+](C)(C)C)=O)=O)C=CN1[C@@]2([H])[C@@](F)(F)[C@@](O)([H])[C@](CO)([H])O2
GOC	O=C1N=C(NC(CCCCCCC(OC(CC([O-])=O)C[N+](C)(C)C)=O)=O)C=CN1[C@@]2([H])[C@@](F)(F)[C@@](O)([H])[C@](CO)([H])O2
GDC	O=C1N=C(NC(CCCCCCCCC(OC(CC([O-])=O)C[N+](C)C)=O)=O)C=CN1[C@@]2([H])[C@@](F)(F)[C@@](O)([H])[C@](CO)([H])O2
PC	[O-]C(CC(OC(CCCCCCCCCCCCCC)=O)C[N+](C)(C)C)=O
i	O=C1N=C(NC([C@@](C)(C)N)=O)C=CN1[C@@]2([H])[C@@](F)(F)[C@@](O)([H])[C@](CO)([H])O2
j	O=C1N=C(N[C@](C)(C)C(N)=O)C=CN1[C@@]2([H])[C@@](F)(F)[C@@](O)([H])[C@](CO)([H])O2
GS	F[C@]1(F)[C@@](O)([H])[C@](CO)([H])O[C@]([H])1N2C=CC(NC(CCC)=O)=NC2=O.C
L-carnitine	C[N+](C)(C)CC(O)CC([O-])=O
Benzyl carnitine	OC(CC(OCC1=CC=CC=C1)=O)CN(C)C
Benzyl carnitine-Succinic acid	C[N](C)(C)CC(OC(CCC(O)=O)=O)CC(OCC1=CC=CC=C1)=O
Benzyl carnitine-Succinic acid-gemcitabine	F[C@]1(F)[C@@](O)([H])[C@](CO)([H])O[C@]([H])1N2C=CC(NC(CCC(OC(CC(OCC3=CC=CC=C3)=O)C[N+](C)(C)C)=O)=O)=NC2=O.C
